# Supplementary material
Source: MDPI journal article supplement (https://www.mdpi.com/search?q=marinedrugs-16-00074)
Supplement: s001 [file marinedrugs-16-00074-s001.pdf]

# Supplementary Information

**Figure S1.** The (+)-HRESIMS spectrum of tetrocarcin Q (1)

**Figure S2.** The  $^1\text{H}$  NMR spectrum of tetrocarcin Q (1)

**Figure S3.** The  $^{13}\text{C}$  NMR spectrum of tetrocarcin Q (1)

**Figure S4.** The HSQC spectrum of tetrocarcin Q (1)

**Figure S5.** The HMBC spectrum of tetrocarcin Q (1)

**Figure S6.** The  $^1\text{H}$ - $^1\text{H}$  COSY spectrum of tetrocarcin Q (1)

**Figure S7.** The ROESY spectrum of tetrocarcin Q (1)

**Figure S8.** The CD spectrum of tetrocarcin Q (1) <sup>⊗</sup>

**Figure S9.** The CD spectra of compounds 1 - 7

**Figure S10.** The  $^{13}\text{C}$  NMR difference spectra of tetrocarcin Q (1) and tetrocarcin A (2)

**Table S1.** The  $^1\text{H}$  and  $^{13}\text{C}$  NMR different data for tetrocarcin Q (1) and tetrocarcin A (2)

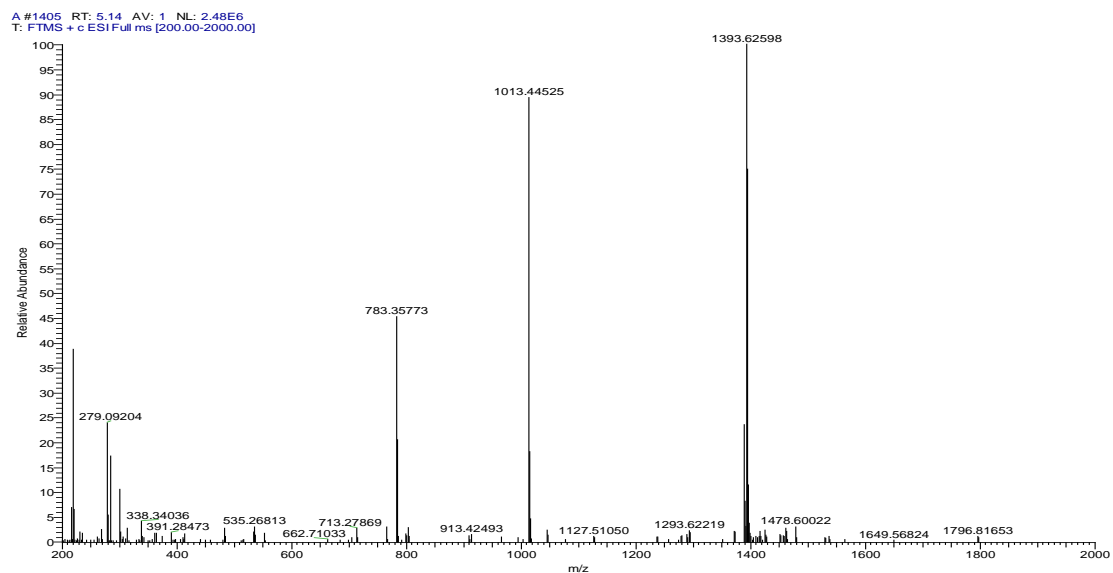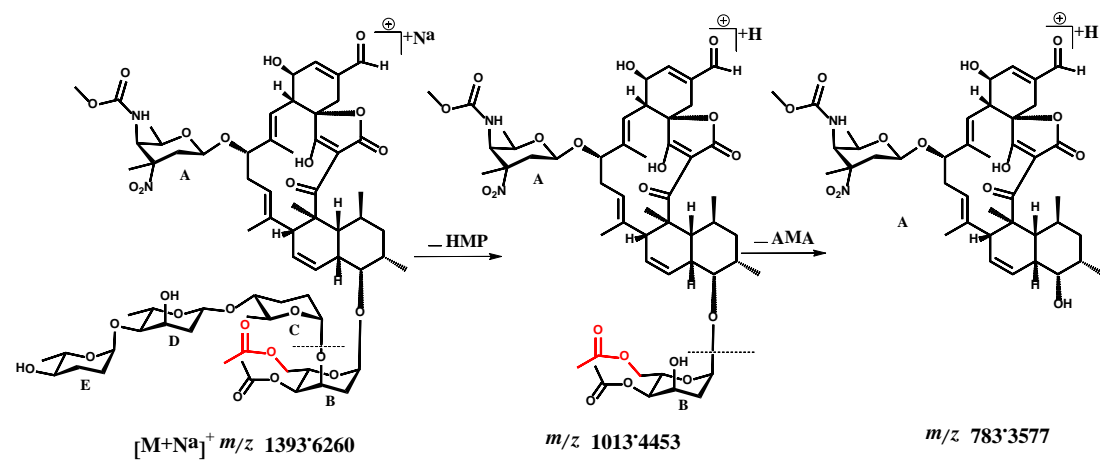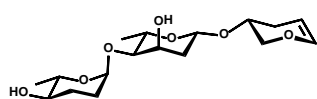

HMP=(2S,3R,6S)-6-(((2S,3R,4R,6R)-4-hydroxy-2-methyl-6-(((2S,3R)-2-methyl-3,4-dihydro-2H-pyran-3-yl)oxy)tetrahydro-2H-pyran-3-yl)oxy)-2-methyltetrahydro-2H-pyran-3-ol

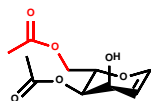

AMA=((2S,3R,4R)-3-acetoxy-4-hydroxy-3,4-dihydro-2H-pyran-2-yl)methyl acetate

Figure S1. The (+)-HRESIMS spectrum of tetrocarcin Q (1)

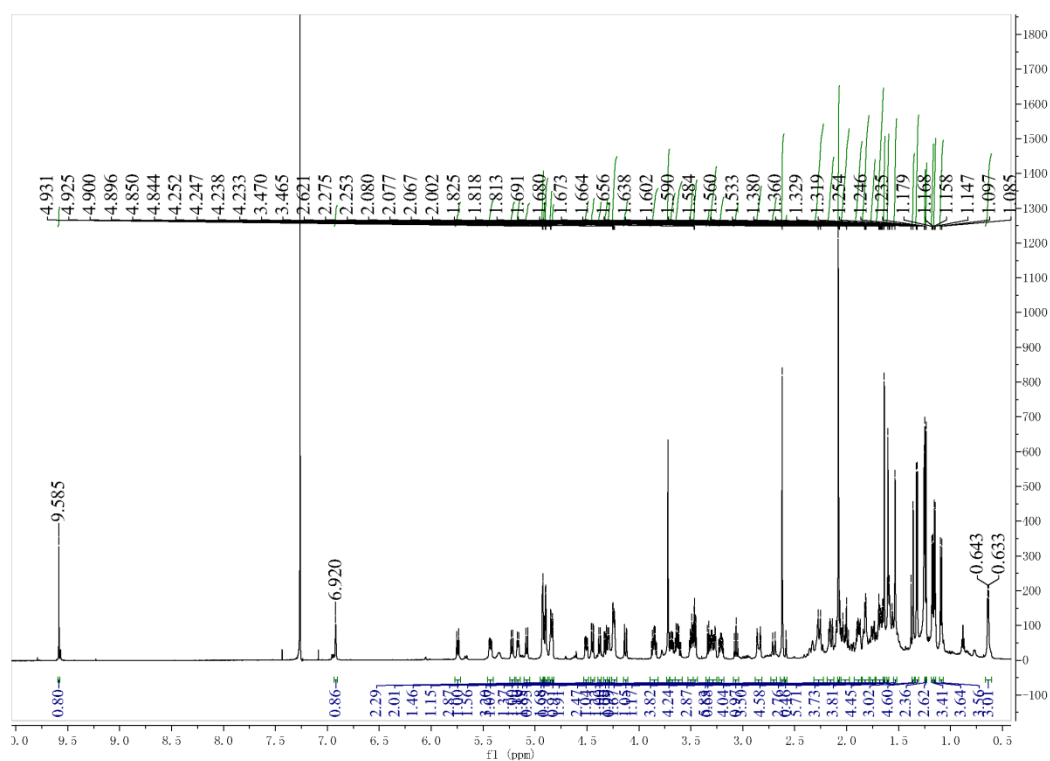

Figure S2. The <sup>1</sup>H NMR spectrum of tetrocarcin Q (1)

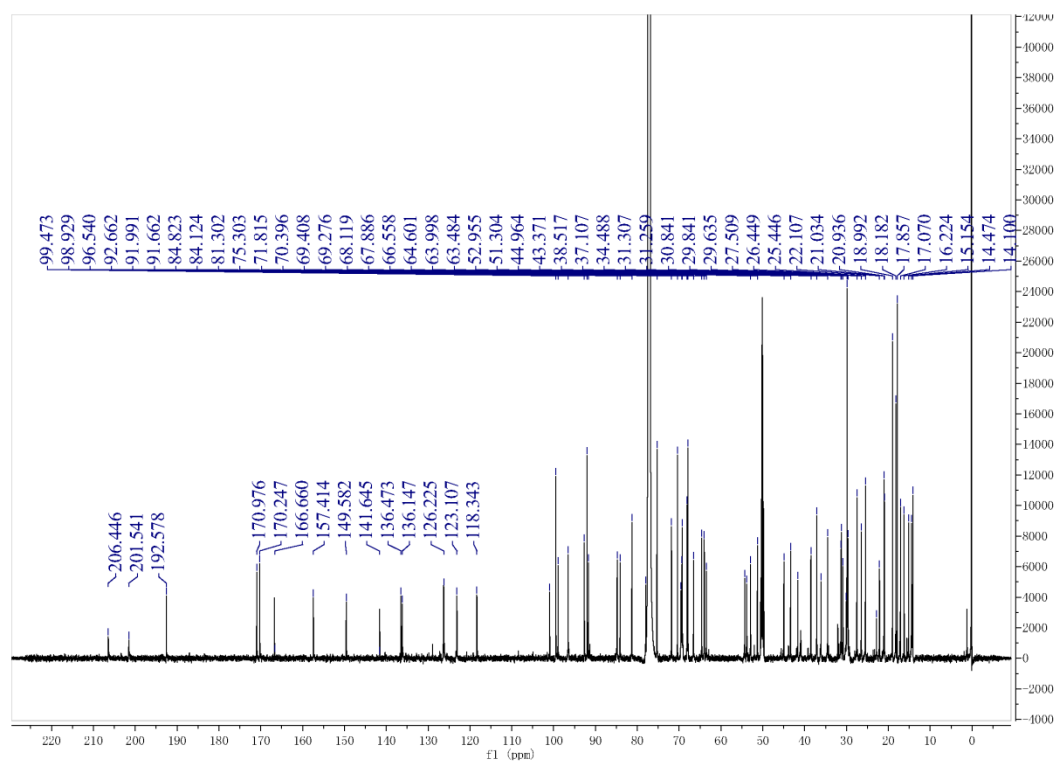

Figure S3. The <sup>13</sup>C NMR spectrum of tetrocarcin Q (1)

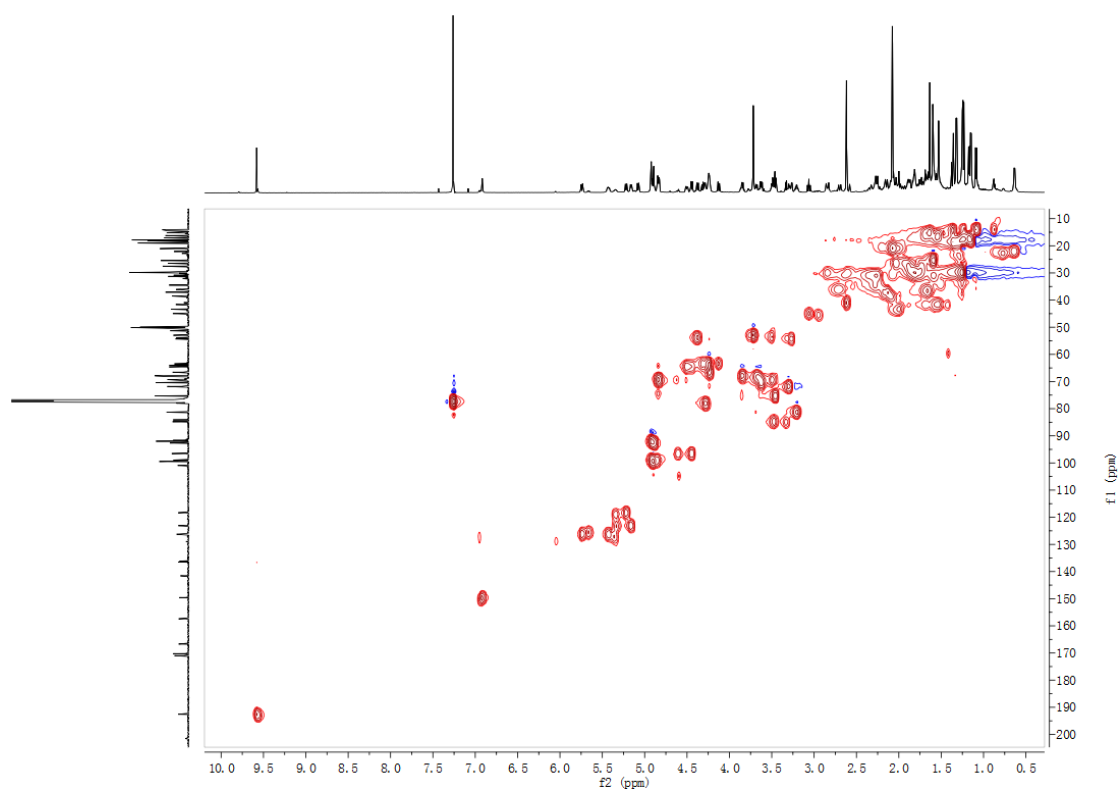

**Figure S4.** The HSQC spectrum of tetrocarcin Q (1)

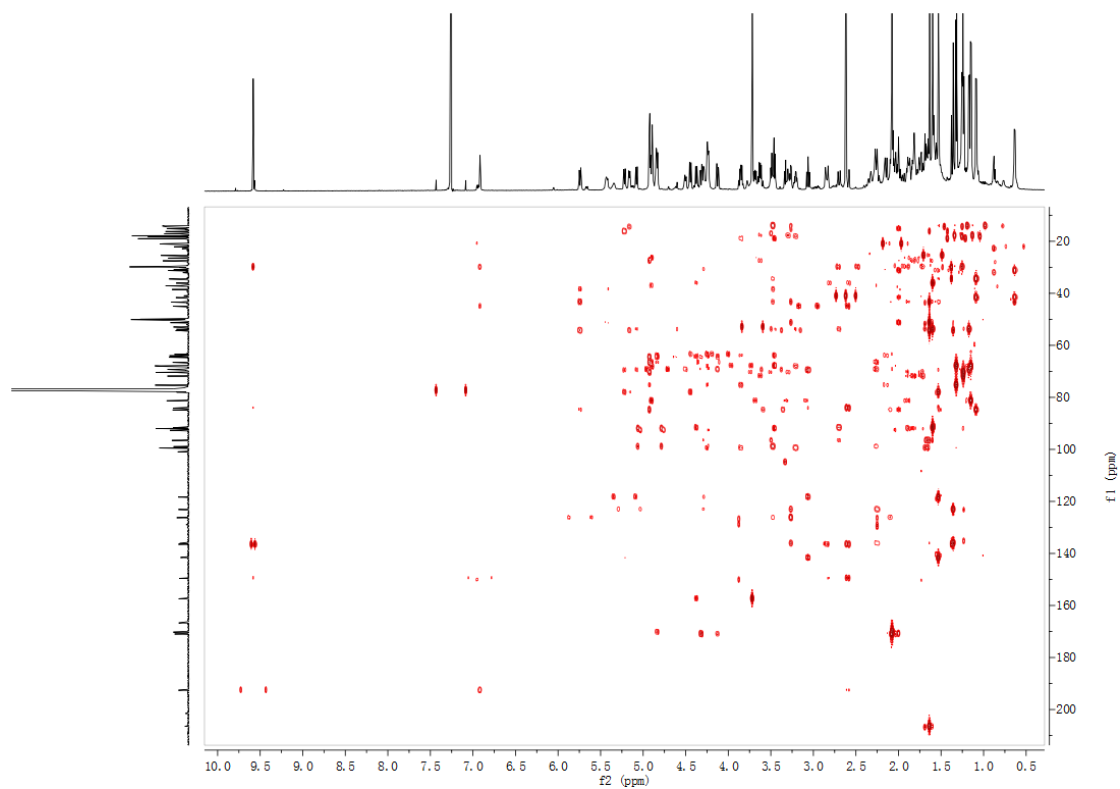

**Figure S5.** The HMBC spectrum of tetrocarcin Q (1)

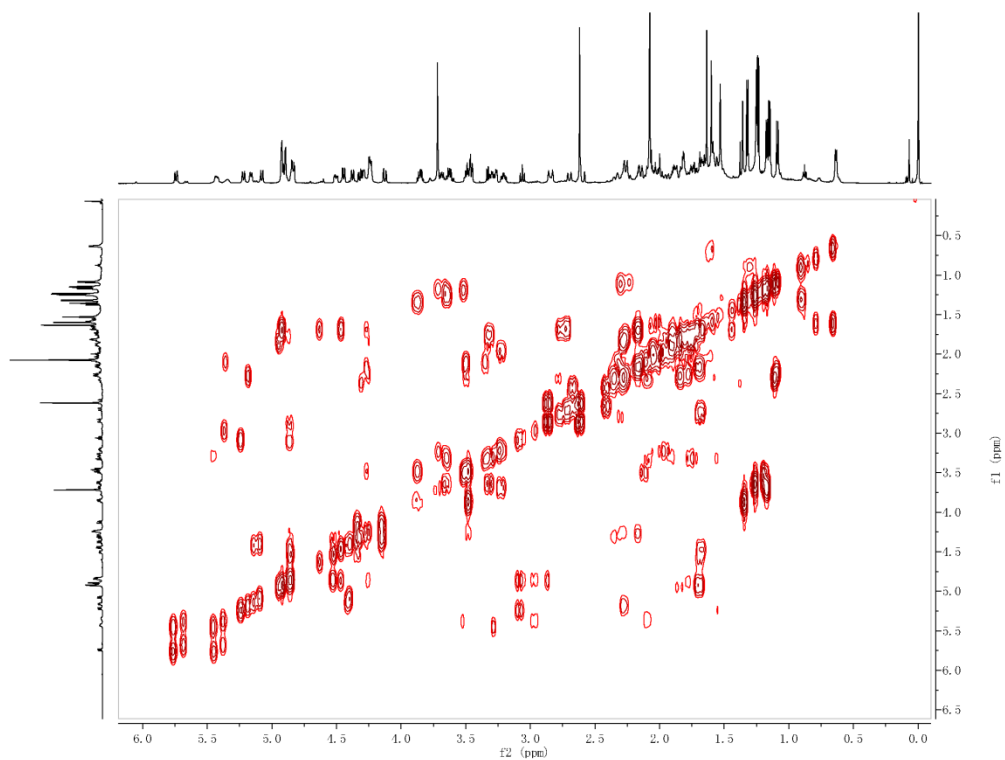

**Figure S6.** The  $^1\text{H}$ - $^1\text{H}$  COSY spectrum of tetrocarcin Q (**1**)

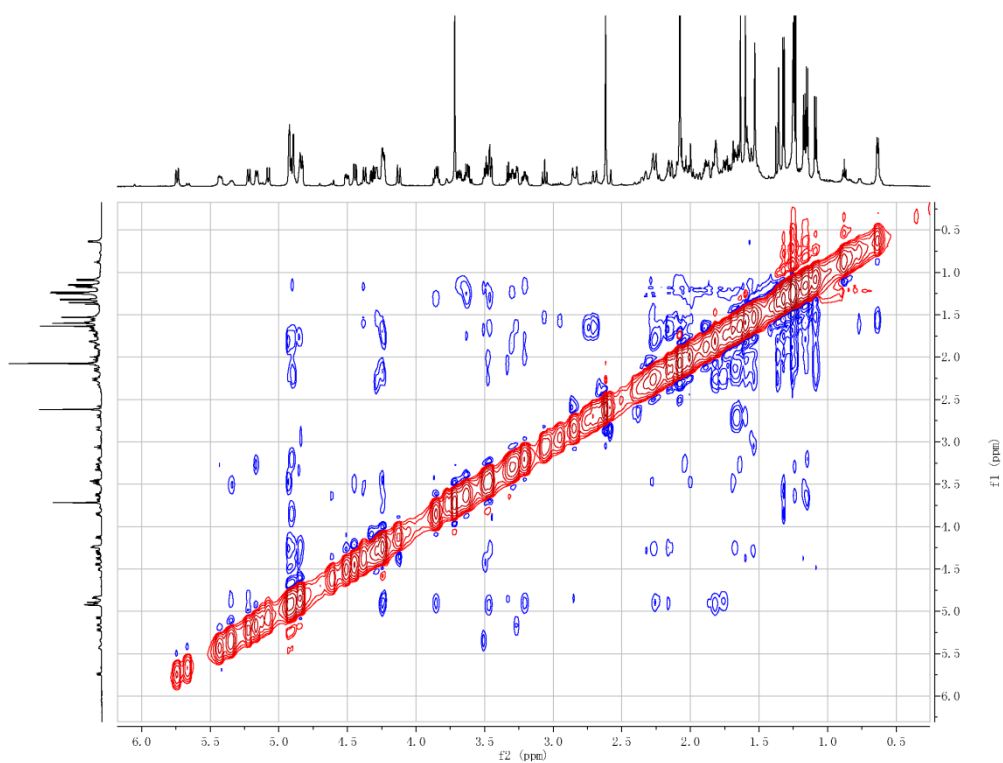

**Figure S7.** The ROESY spectrum of tetrocarcin Q (**1**)

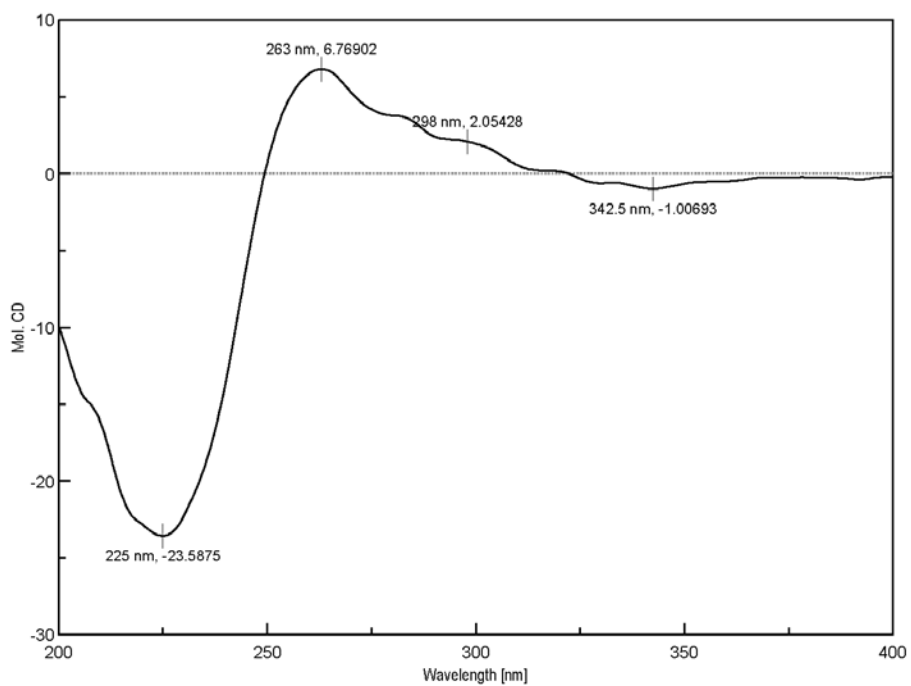

**Figure S8.** The CD spectrum of tetrocarcin Q (1)

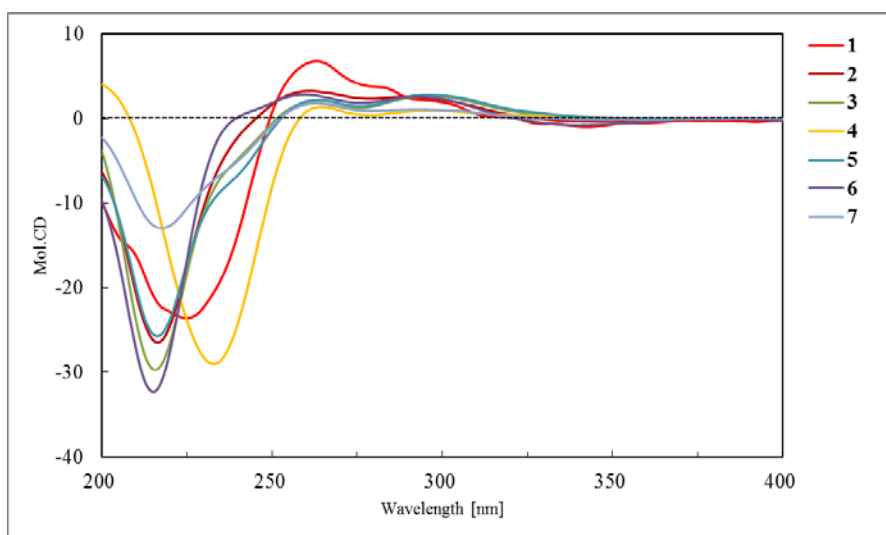

**Figure S9.** The CD spectra of compounds 1 - 7 (c 0.5(w/v)%, MeOH)

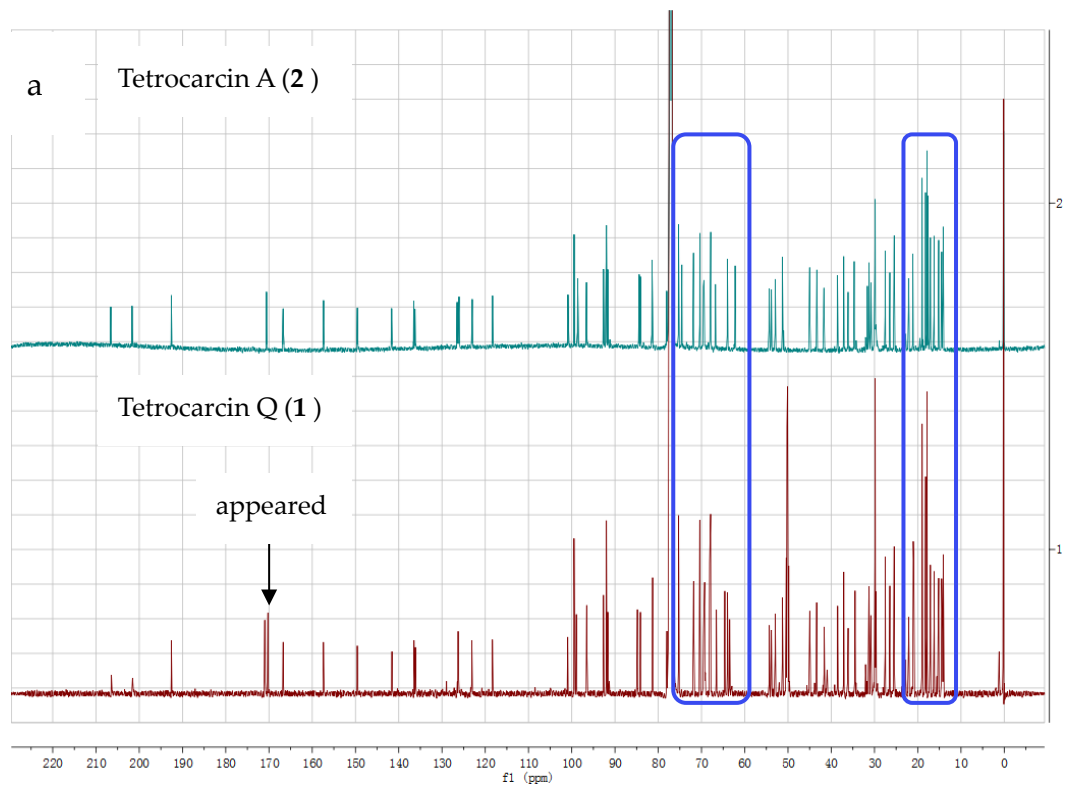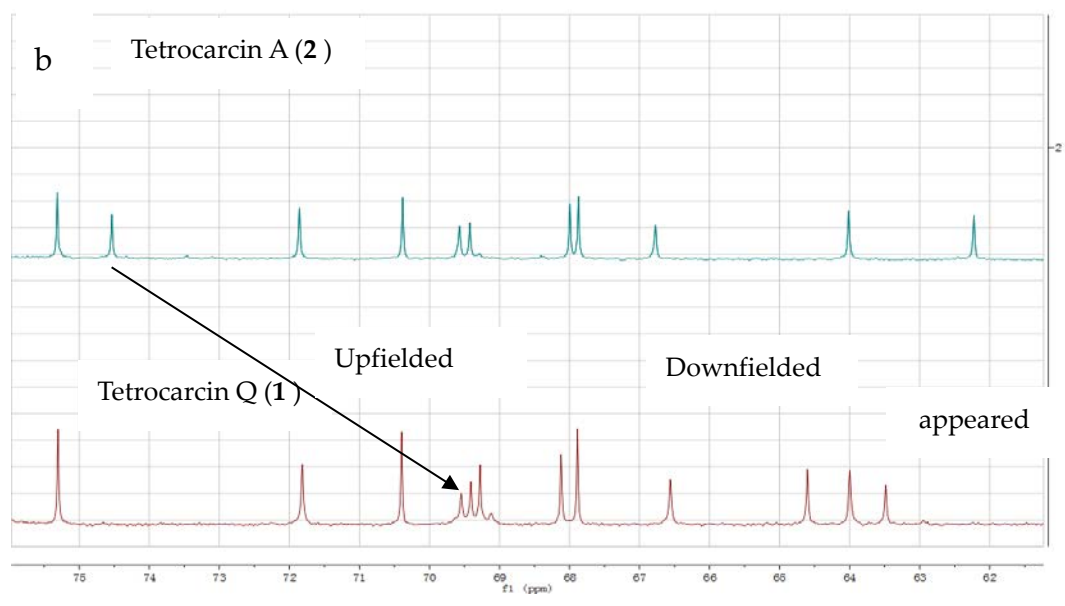

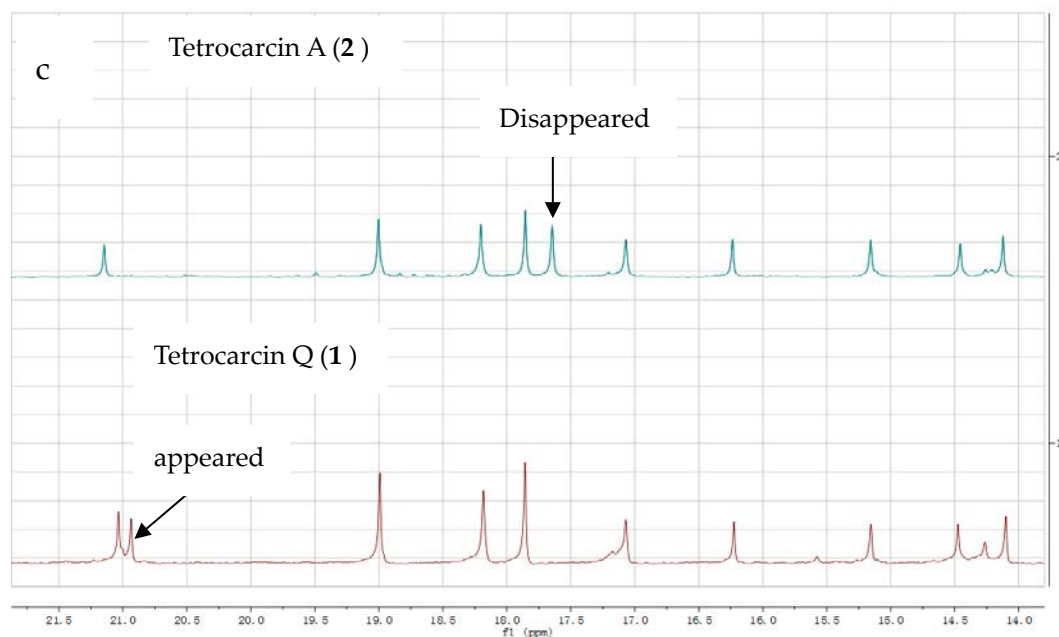

**Figure S10.** The  $^{13}\text{C}$  NMR difference spectra of tetrocarcin Q (1) and tetrocarcin A (2). **a)** Full spectra; **b)** Partial spectra in 61.5 – 75.8 ppm; **c)** Partial spectra in 14.0 – 21.5 ppm.

**Table S1.** The  $^1\text{H}$  and  $^{13}\text{C}$  NMR different data for tetrocarcin Q (1) and tetrocarcin A (2).

| No.                   | tetrocarcin Q (1)                          |                     | tetrocarcin A (2)                      |                     |
|-----------------------|--------------------------------------------|---------------------|----------------------------------------|---------------------|
|                       | $\delta_{\text{H}}$ mult. ( $J$ in Hz)     | $\delta_{\text{C}}$ | $\delta_{\text{H}}$ mult. ( $J$ in Hz) | $\delta_{\text{C}}$ |
| B-1                   | 4.90, d (4.8)                              | 98.9                | 4.83, d (4.8)                          | 98.6                |
| B-2                   | 2.24, dd (14.4, 3.0); 1.79, m              | 31.2                | 2.24, dd (14.4, 3.0); 1.79, m          | 31.3                |
| B-3                   | 4.23, m                                    | 66.5                | 3.85, m                                | 66.6                |
| B-4                   | 4.83, dd (10.5, 3.0)                       | 69.5                | 4.57, dd (9.6, 3.0)                    | 74.5                |
| B-5                   | 4.50, m                                    | 64.6                | 4.36, m                                | 62.2                |
| B-6                   | 4.32, dd(12.0,5.4);<br>4.12, dd (12.0,1.8) | 63.5                | 1.13, d(6.6)                           | 17.6                |
| B4-OCOCH <sub>3</sub> | 2.08, s                                    | 20.9                | 2.09, s                                | 21.2                |
| B4-OCOC <sub>3</sub>  |                                            | 170.2               |                                        | 170.6               |
| B6-OCOCH <sub>3</sub> | 2.07, s                                    | 21.0                |                                        |                     |
| B6-OCOC <sub>3</sub>  |                                            | 170.9               |                                        |                     |
